# Supplementary material
Source: Springer Nature journal article supplement (https://www.springermedizin.de/resource/supplementary/13221_2013_93_MOESM2_ESM.pdf/9680910)

## basal conditions

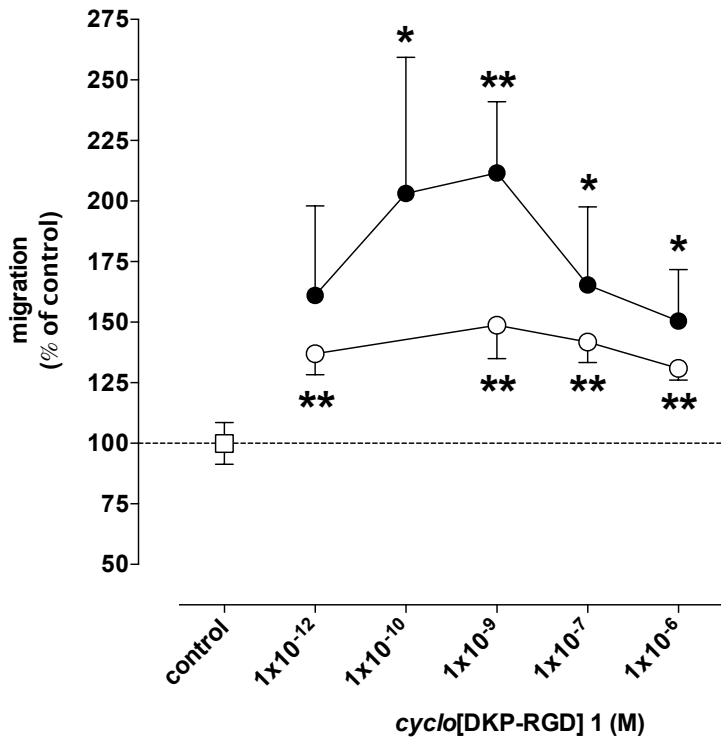

## VEGF + EGF + IGF-I + FGF2

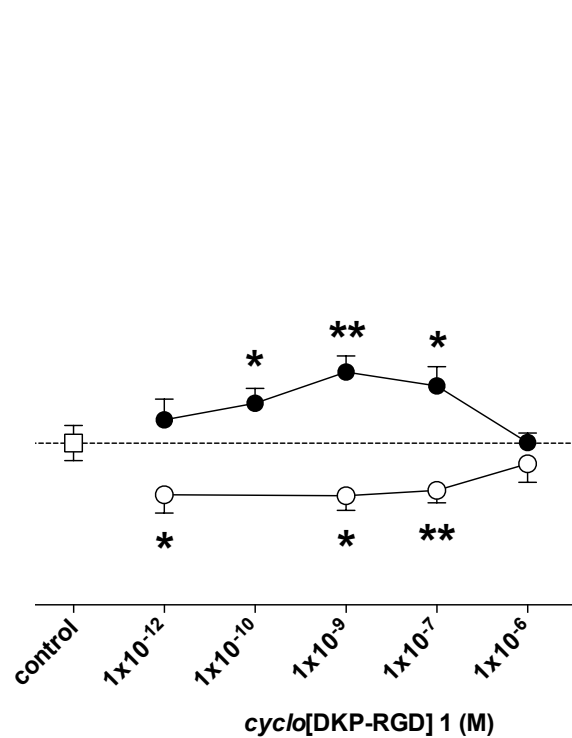

Supplement: MOESM2 [file 9680910]
